# Supplementary material
Source: MDPI journal article supplement (https://www.mdpi.com/2410-3888/8/6/290)
Supplement: s1 [file s1]

# Supplementary Material

## 2. Materials and Methods

### 2.1.3 Measurement of length and thickness of new formation shells of oysters

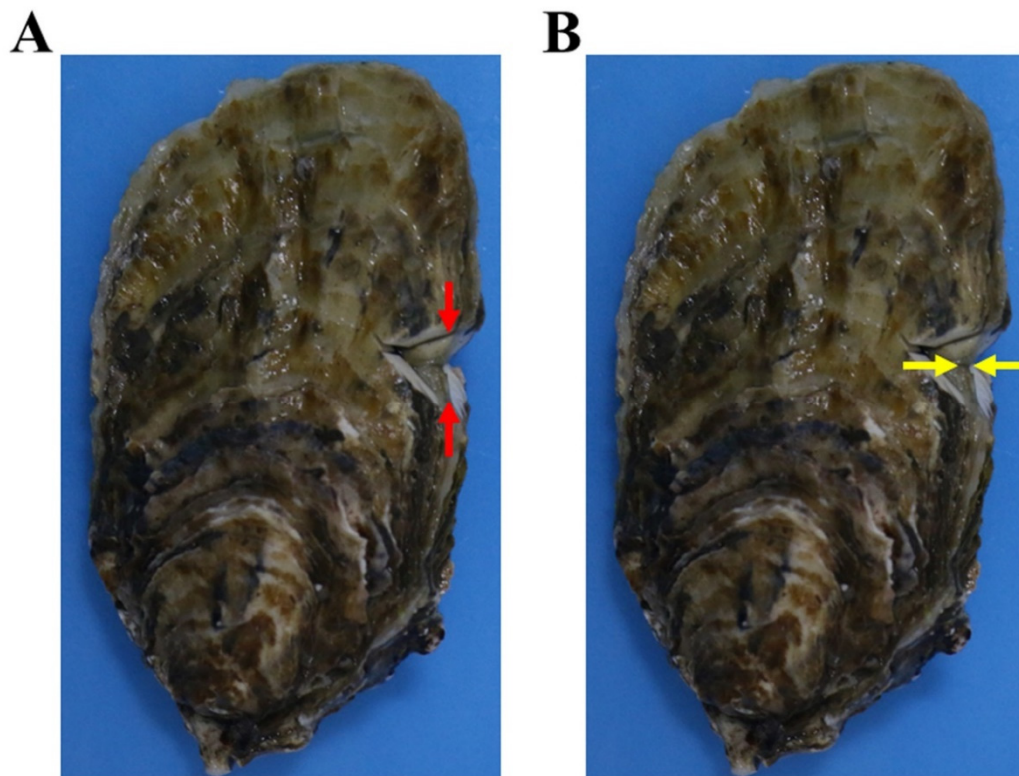

**Figure S1. The length and thickness of new formation oyster shells.**

(A) Length (labeled with red arrows) of Newly formed oyster shells after perforation stimulation and acidification treatment; (B) Thickness (labeled with yellow arrows) of Newly formed oyster shells after perforation stimulation and acidification treatment.

## 3. Results

### 3.1 The sequence characteristics and phylogenetic relationship of MgCMP1
