# Supplementary material
Source: MDPI journal article supplement (https://www.mdpi.com/2410-3888/8/6/290)
Supplement: s1 [file s1]

Archive with 1 entries (1 files):
- fishes-2377594-supplementary.pdf
